# Supplementary material for: Functional Dissection of Sugar Signals Affecting Gene Expression in Arabidopsis thaliana
Source: PLoS One. 2014 Jun 20;9(6):e100312. doi: 10.1371/journal.pone.0100312 (PMC4065033; doi:10.1371/journal.pone.0100312)
Supplement: Dataset S1 — Comparison of a set of sugar responsive genes identified in the present study (habituated cell culture) with sets of genes identified for whole plants in studies by Usadel et al. [4] , Bläsing et al . [25] and Osuna et al. [7] . (XLSX) [file pone.0100312.s012.xlsx]

## Sheet: Sheet5
								overlapp with other large-scale gene expression data
sub-group	AGI	Fructose/Xylose	Sucrose/Xylose	Glucose/Xylose	Xylose/Xylose	short discription	abbreviation	Usadel et al 2008						Bläsing et al. 2005			osuna et al. 2007
								early in light/dark cycle	slightly later in the diurnal cycle	start of the extended night	late in the extended night	no or unrelated to changes of sugar		genespotentially involved in sugar-dependent changes of gene expression in the diurnal cycle	top 200 glc responisve		FN vs Cst T0	S30 vs Cst T0	S3h vs Cst 3h
suc_glc_fru	AT1G48760	0.910322	0.910574	0.925363	1	← protein trafficing (subunit of AP3 complex)	← PAT4, alpha-Adaptin, delta-ADR	0	0	0	0	0		0	0		0	0	0
	AT1G53530	1.05478	1.04933	1.05487	1	← transmembrane peptidase		0	0	0	0	0		0	0		0	0	0
	AT1G55860 /// AT1G70320	0.946341	0.928	0.937196	1	← ubiquitine E3 ligase containing HECT domain	← UPL1	0	0	0	0	0		0	0		0	0	0
	AT3G01320	0.923086	0.942636	0.946373	1	← histone deacetylation, transcritpional regulator	← SIN3-like1 (SNL1)	0	0	0	0	0		0	0		0	0	0
	AT3G25400	1.08952	1.1046	1.12128	1	← UG		0	0	0	0	0		0	0		0	0	1
	AT3G49490	0.951478	0.960235	0.956312	1	← fatty acid b-oxidation		0	0	0	0	0		0	0		0	0	0
	AT4G23470	0.892126	0.923221	0.906106	1	← PLAC8protein		0	0	0	0	0		0	0		0	0	0
	AT5G22920	0.909083	0.920447	0.893201	1	← CHY-type/CTCHY-type/RING-type Zinc finger protein;		0	1	0	0	0		1	0		1	1	1
	AT5G28770	0.868162	0.864099	0.846516	1	← TF	← βZip63	1	0	0	0	0		0	0		1	1	1
	AT5G47280	0.88226	0.847821	0.882823	1	← NTPase activity	← ADR1-L3	0	0	0	0	0		0	0		0	0	0
Fru_glc		Fructose	Sucrose	Glucose	X
	AT1G08620	0.936055	0.95051	0.90801	1	← histone methylation	← JmJ16	0	0	0	0	0		0	0		0	0	0
	AT1G17210	0.95235	0.952384	0.94876	1	← hypothetical protein, putativeorthologs of cell-cycle modulated genes	← ILP1	0	0	0	0	0		0	0		0	0	0
	AT1G55850	0.907495	0.975608	0.912568	1	← cellulose synthase like	← AtCstE1	0	0	0	0	0		0	0		0	0	1
	AT1G70900	1.11627	1.06556	1.11769	1	← UG (unknown protein)		0	0	0	0	0		0	0		0	0	0
	AT2G11810	1.52037	1.17217	1.40401	1	← galactolipid metabolism during phosphate starvation	← MGD3	0	0	0	0	0		0	0		0	0	0
	AT2G22080	1.1153	1.05754	1.14154	1	← UG (unknown protein)		0	0	0	0	0		0	0		0	0	0
	AT2G25930	0.928225	0.962989	0.926646	1	← nuclear protein involved in flowering	← ELF3	0	0	0	0	0		0	0		0	0	1
	AT2G29670	1.06552	1.01602	1.06593	1	← TPR-like superfamily		0	0	0	0	0		0	0		1	0	0
	AT2G36310	0.933956	0.957939	0.95441	1	← nucleosidase activity (cleavage of UMP)	← URH1	0	0	0	0	0		0	0		0	0	0
	AT2G36320	0.945589	0.955408	0.943888	1	← Zinc-finger protein		0	0	0	0	0		0	1		0	1	1
	AT3G17790	1.07021	1.03276	1.05828	1	←phosphate starvation/ deficiency induced gene	← interactive ACP5	0	0	0	0	0		0	0		0	0	0
	AT3G50050	0.909055	0.969883	0.919705	1	←aspartyl protease		0	0	0	0	0		0	0		0	0	0
	AT3G57570	0.900902	0.95838	0.893093	1	← unknown		0	0	0	0	0		0	0		0	0	0
	AT4G03080	0.952481	0.95412	0.948592	1	← BR1 supressor1-like1, BA signaling	← BSL1	0	0	0	0	0		0	0		0	0	0
	AT4G29060	0.901766	0.954765	0.913888	1	←RNA binding, translation elongation activity	← PSRP-7, EMB2726	0	0	0	0	0		0	0		0	0	0
	AT4G33030	1.11518	1.04372	1.10024	1	← sulfolipid biosynthesis in plant development	← SQD1	0	0	0	0	0		0	0		0	0	0
	AT5G20410	1.34207	1.11144	1.2765	1	← type B monogalactosyldiacylglycerol (MGDG)	← MGD2	0	0	0	0	0		0	0		0	0	0
	AT5G20790	1.31893	1.20424	1.281	1	← UG (unknown protein)		0	0	0	0	0		0	0		0	0	0
	AT5G22830	0.947775	0.973063	0.933873	1	←transmembrane magnesium transporter	← MRS2-11, AtMGT10	0	0	0	0	0		0	0		0	0	0
	AT5G45510	0.946199	0.955806	0.941198	1	← NBS-LRR family protein		0	0	0	0	0		0	0		0	0	0
	AT5G67080	1.18778	1.11194	1.18713	1	← MAPKKK	← MAPKKK19	0	0	0	0	0		0	0		0	0	0
Suc_fru		Fructose	Sucrose	Glucose	X
	AT1G06230	0.939441	0.91844	0.966509	1	←BET bromodomain factor, maintainance of cell cycle, global transcription factor	← GTE4	0	0	0	0	0		0	0		0	0	0
	AT1G14650	0.906206	0.922813	0.954156	1	← mRNA processing	← SWAP/Surp2, atSAP114-1a	0	0	0	0	0		0	0		0	0	0
	AT1G15130	0.914965	0.930829	0.950088	1	← endosomal targeting	← BRO1	0	0	0	0	0		0	0		0	0	0
	AT1G23870	0.80503	0.848236	0.914155	1	← class II TPS, no TPS activity	← TPS9	1	0	0	0	0		0	0		1	1	1
	AT3G27670	0.92363	0.936538	0.963004	1	← might be involved in lipid signaling	← rst1	0	0	0	0	0		0	0		0	0	0
	AT4G02480	0.952375	0.943582	0.959364	1	← AAA-type ATPase family protein		0	0	0	0	0		0	0		0	0	0
	AT4G14900	0.920582	0.924895	0.945673	1	← FRIGIDA-like protein		0	0	0	0	0		0	0		0	0	0
	AT4G29380	0.917782	0.943198	0.952675	1	← modulation of PI3P formation	← AtVPS15	0	0	0	0	0		0	0		0	0	1
	AT4G30790	0.90297	0.899234	0.949342	1	← involved in autophagy		0	0	0	0	0		0	0		0	0	1
	AT5G64390	0.929079	0.923227	0.938198	1	← RNA binding protein	← Hen4	0	0	0	0	0		0	0		0	0	0
Suc_glc		Fructose	Sucrose	Glucose	X
	AT1G02080	0.968326	0.922149	0.940503	1	←transcription regulator		0	0	0	0	0		0	0		0	0	0
	AT1G08370	0.934742	0.928711	0.91206	1	← mRNA processing	← AtDCP1	0	0	0	0	0		0	0		0	0	0
	AT1G20270	0.991824	1.06688	1.07724	1	← 2OG and FE(II)-dependent oxygenase superfamily	← put. AtP4H3	0	0	0	0	0		0	0		0	0	0
	AT1G20670	0.957243	0.889385	0.916974	1	← BA signalling	← AtBRD1	0	0	0	0	0		0	0		0	0	0
	AT1G50030	0.958826	0.918316	0.896893	1	← energy state, authophagy, sugar signalling	← TOR	0	0	0	0	0		0	0		0	0	0
	AT1G70290	0.891808	0.814246	0.853496	1	← TPSlike, no TPSactivity, Glc-repressed	← TPS8	0	1	0	0	0		0	0		1	1	1
	AT1G72240	1.08593	1.13272	1.14875	1	← unknown protein		0	0	0	0	0		0	0		0	0	0
	AT2G17930	0.956442	0.925903	0.946367	1	← Phosphatidylinositol 3- and 4-kinase family protein with FAT domain		0	0	0	0	0		0	0		0	0	0
	AT2G20190	1.03819	1.03536	1.08077	1	← microtubule accociated protein	← CLASP	0	0	0	0	0		0	0		0	0	0
	AT2G28190	1.04872	1.07058	1.074	1	← copper/zink dismutase	← CSD2	0	0	0	0	0		0	0		0	0	0
	AT2G28290	0.959261	0.929154	0.940875	1	← Chromatin remodelling	← Splayed/SYD	0	0	0	0	0		0	0		0	0	0
	AT3G02260	0.94797	0.909395	0.913961	1	← polar auxin transport, shade avoidance	←BIG/DOC1, ASA1, TIR3	0	0	0	0	0		0	0		0	0	0
	AT3G07100	0.977326	0.95404	0.952573	1	← COPII Coat Protein, ER/GOLGI-trafficing	←AtSec24A, ERMO2	0	0	0	0	0		0	0		0	0	0
	AT3G07160	0.980273	0.957164	0.953363	1	← glucan synthase like, callose deposition	←GSL10	0	0	0	0	0		0	0		0	0	0
	AT4G01880	1.00579	1.06887	1.08761	1	← tRNA processing, methyltransferase		0	0	0	0	0		0	0		0	0	0
	AT4G17140	0.969089	0.943121	0.945682	1	← Plekstrin domain containing protein		0	0	0	0	0		0	0		0	0	0
	AT4G27380	1.02868	1.06539	1.05908	1	← expressed protein		0	0	0	0	0		0	0		0	0	1
	AT4G38600	0.981727	0.935731	0.943025	1	← HECT Ubiquitin protein ligase 3	←KAKTUS	0	0	0	0	0		0	0		0	0	0
	AT5G02310	0.964209	0.938609	0.94724	1	← Ubiquitin ligase of the N-end rule pathway	←PRT6	0	0	0	0	0		0	0		0	0	0
	AT5G22770 /// AT5G22780	0.98306	0.960809	0.944216	1	← clatherin adaptor complex, vacuolar sorting	←α-ADR, α-adaptin	0	0	0	0	0		0	0		0	0	0
	AT5G61600	0.975501	0.883767	0.896169	1	← transfcription factor	←ERF104	0	0	1	0	0		0	0		1	1	1
Fru	AGI	Fructose	Sucrose	Glucose	X			0	0	0	0	0		0	0		0	0	0
	AT1G01490	0.918676	0.963784	0.976489	1	← unknown protein (putative metal transporter)		0	0	0	0	0		0	0		0	0	0
	AT1G02710	1.14731	1.09626	1.05827	1	← unknown protein		0	0	0	0	0		0	0		0	0	0
	AT1G05000	1.08537	1.03516	1.05777	1	← dual-specific phosphatase, induced in Pi/SUC	← AtPFA-DSP1	0	0	0	0	0		0	0		0	1	1
	AT1G07730	1.16061	1.13582	1.07073	1	← disease resistance		0	0	0	0	0		0	0		0	0	0
	AT1G08600	0.929675	0.943283	0.963572	1	← transcritional regulator, chromatin remodeling	← ATRX, CHR20	0	0	0	0	0		0	0		0	0	0
	AT1G13980	0.937616	0.946169	0.951095	1	← GOLGI vesicle transport	← GNOM	0	0	0	0	0		0	0		0	0	0
	AT1G16750	1.16575	1.10934	1.10186	1	← unknown protein		0	0	0	0	0		0	0		0	0	0
	AT1G19860	0.858484	0.921815	0.8949	1	← CCCH-zink finger family protein		0	0	0	0	0		0	0		0	0	0
	AT1G22070	1.11941	1.04572	1.10841	1	← Transcription factor with bZIP domain, involved in PR response	← TGA3, AtbZIP22	0	0	0	0	0		0	0		0	0	1
	AT1G27080	1.14121	1.04911	1.04556	1	← low affinity nitrate transport in phloem	← NRT1.6	0	0	0	0	0		0	0		0	0	0
	AT1G28480	1.11771	1.01624	1.00803	1	← Glutathion reductase, might interact with TGA protein during defense response	← GRX480/ROXY19	0	0	0	0	0		0	0		0	0	0
	AT1G32810	0.955254	0.962207	0.986637	1	← RING/zinc-finger protein (RNA processing)		0	0	0	0	0		0	0		0	0	0
	AT1G33780	1.04523	1.00314	1.02029	1	← protein o funknown function		0	0	0	0	0		0	0		0	0	0
	AT1G34630	0.920967	0.973403	0.971523	1	← unknown gene		0	0	0	0	0		0	0		0	0	0
	AT1G35250	1.16903	1.0683	1.04442	1	← thioesterase superfamily (fatty acid metab.?)		0	0	0	0	0		0	0		0	0	1
	AT1G38065 /// AT1G38131	1.089	1.01005	1.03528	1	← O-fucosyltransferase family protein		0	0	0	0	0		0	0		0	0	0
	AT1G46840	0.887524	0.98544	0.988062	1	← F-box family protein (membrane bound?)		0	0	0	0	0		0	0		0	0	0
	AT1G49160	0.892379	0.961062	0.937776	1	← WNK protein kinase (responsive to nitrate)	← WNK7	0	0	0	0	0		0	0		0	0	0
	AT1G50110	1.18489	1.06378	1.16079	1	← amino acid metabolism (D-aminoacid aminotransferase-like PLP-dependent enzymes superfamily protein)		0	0	0	0	0		0	0		1	0	1
	AT1G51810	1.12388	1.05486	1.08887	1	← LRR-Kinase		0	0	0	0	0		0	0		0	0	0
	AT1G54490	0.928752	0.957414	0.956407	1	← RNA-decay, degradation	← AIN1, EIN5, XRN4	0	0	0	0	0		0	0		0	0	0
	AT1G64560	1.2587	1.01873	1.05446	1	← pseudogene		0	0	0	0	0		0	0		0	0	0
	AT1G68590	0.858541	0.983382	0.925721	1	← plastid-specific ribosomal protein	← PSRP 3	0	0	0	0	0		0	0		0	0	1
	AT1G71130	1.08708	1.04759	1.06247	1	← transcritpion factor, cytokinin responsive, responsive to phoshate starvation	← CRF8	0	0	0	0	0		0	0		0	0	0
	AT1G73010	1.19221	1.08926	1.13389	1	← inorganic pyrophosphatase, response to starvation, misregulated in CAX mutants	← ATPPSPASE1, PPSPASE1, PS2,	0	0	0	0	0		0	0		0	0	0
	AT1G75730	0.883109	0.971481	0.928382	1	← unknown protein		0	0	0	0	0		0	0		0	0	0
	AT2G02710	0.932036	0.97252	0.940875	1	← putative light receptor protein	← PAS/LOV PROTEIN, PLPB	0	0	0	0	0		0	0		1	1	1
	AT2G10940	1.12268	1.05488	1.10023	1	← lipid transfer, DEG in TPS1 oe		0	0	0	0	0		0	0		0	0	0
	AT2G15340	1.13568	1.0497	1.0558	1	← glycine rich protein		0	0	0	0	0		0	0		0	0	0
	AT2G16910	1.16347	1.05529	1.0929	1	← bHLH-transcription factor	← AMS, aborted microspores	0	0	0	0	0		0	0		0	0	0
	AT2G18090	0.923788	0.93871	0.960969	1	← regulation of transcription, PHD-finger family protein		0	0	0	0	0		0	0		0	0	0
	AT2G20980	1.09661	1.06429	1.00568	1	← DNA replication	← MCM10	0	0	0	0	0		0	0		0	0	0
	AT2G23740	1.07441	1.04798	0.987797	1	← C2H2-zink finger family protein, regulation of transcription	← SUVR5 or SUVH6 ??	0	0	0	0	0		0	0		0	0	0
	AT2G25540	1.15508	1.06948	1.05435	1	← cellulose synthase 10	← CESA10	0	0	0	0	0		0	0		0	0	0
	AT2G32600	0.909649	0.932836	0.955158	1	← C2H2-zink finger family protein, RNA processing; spliceosome	← atSAP62	0	0	0	0	0		0	0		0	0	0
	AT2G35920	0.953519	0.972537	0.960054	1	← RNA helicase family, N-terminal protein myristoylation		0	0	0	0	0		0	0		0	0	0
	AT2G36450	1.13228	1.00958	1.0211	1	← AP2/ERF-like TF, transcriptional regulator, response to funghi,	← HARDY, HRD	0	0	0	0	0		0	0		0	0	0
	AT2G37890	1.12087	1.05023	1.07619	1	← mitochondrial substrate carrier (possiby involved in ATP transport)		0	0	0	0	0		0	0		0	0	1
	AT2G38940	1.22768	1.09408	1.09653	1	← phosphate transport	← AtPT2, Pht1.4	0	0	0	0	0		0	0		0	1	1
	AT3G02040	1.11605	1.04227	1.07913	1	← glycerophosphodiester phosphodiesterase family, response to phosphate starvation, senescence	← AtGDPD1, SRG3	0	0	0	0	0		0	0		0	0	1
	AT3G03790	1.13055	1.00291	1.10322	1	← regulation of chromosome condensation		0	0	0	0	0		0	0		0	0	0
	AT3G07980 /// AT3G13530	0.932715	0.957136	0.956339	1	← MAPkinase, pollen viability	← MAP3K-2, MAPKKK6	0	0	0	0	0		0	0		0	0	0
	AT3G12350	1.05405	1.01544	1.02425	1	← unknown F-box protein, upregulated in Pi+, Suc+		0	0	0	0	0		0	0		0	0	0
	AT3G18480	0.929168	0.970283	0.956026	1	← GOLGI structural protein	← AtCASP	0	0	0	0	0		0	0		0	0	0
	AT3G23840	1.11183	1.08635	1.07961	1	← fatty acid elongase like protein		0	0	0	0	0		0	0		0	0	0
	AT3G29070	1.15706	1.00796	1.02756	1	← unknown protein, emp24/gp25L/p24 family/GOLD family protein, transmembrane protein transport		0	0	0	0	0		0	0		0	0	0
	AT3G44020	1.12981	1.0445	1.11906	1	← glutaredoxin like protein	← AtGRL11	0	0	0	0	0		0	0		0	0	1
	AT3G44510	1.3719	1.17062	1.29264	1	← expressed protein, responsive to suc and phosphate starvation		0	0	0	0	0		0	0		0	0	0
	AT3G47420	1.08697	1.04441	1.05571	1	← carbohydrate transporter (over membrane), induced in Pi deficiency	← AtG3PP1, ATPS3,	0	0	0	0	0		0	1		0	1	0
	AT3G47890 /// AT3G47910	0.893845	0.922302	0.910392	1	← Ubiquitin carboxyl-terminal hydrolase-related protein		0	0	0	0	0		0	0		0	0	0
	AT3G49140	0.852811	0.962183	0.893725	1	← PPR-family protein, putative posttranscriptional regulation		0	0	0	0	0		0	0		0	0	1
	AT3G49160	0.774214	0.902265	0.908875	1	← pyruvate kinase family protein, responsive to ROS	← PRKR (pyruvate kinase related)	0	0	0	0	0		0	0		1	0	1
	AT3G53260	0.940385	0.983412	0.95111	1	← phenylalanine lyase, flavonoid and lignin biosynthesis	← ATPAL2, PAL2	0	0	0	0	0		0	0		0	0	1
	AT3G57240	1.12314	0.984245	1.05364	1	← hydrolysis of O-glycosyl compounts	← BG3	0	0	0	0	0		0	0		0	0	0
	AT3G61940	1.12605	0.993472	1.05705	1	← Zinc transporter	← ATMTPA1, MTPA1	0	0	0	0	0		0	0		1	0	0
	AT4G00320 /// AT5G41830	0.941479	0.98289	0.959179	1	← unknown F-box protein		0	0	0	0	0		0	0		0	0	0
	AT4G00800	1.14072	1.04	1.03275	1	← transducine/WD40-repeat family protein , transmembrane	← SETH5	0	0	0	0	0		0	0		0	0	0
	AT4G03570	1.1289	1.02704	1.07849	1	← unknown protein		0	0	0	0	0		0	0		0	0	0
	AT4G14090	1.15308	1.03872	1.00118	1	← UDP flavonoid 5-Oglycosyltransferase, responds to suc stimulus, Anthocyanin synthesis	← UFGT, 5GT	0	0	0	0	0		0	0		0	0	0
	AT4G29750	0.917462	0.964412	0.966952	1	← CRS1 / YhbY (CRM) domain-containing protein, RNA binding, ABA and G-protein co-regulated in guard cells and leaf cells		0	0	0	0	0		0	0		0	0	0
	AT4G33980	0.833939	0.898523	0.913424	1	← best match: cold regulated gene 27	← COR28	0	0	0	0	0		0	1		1	1	1
	AT4G34150	0.877368	0.905084	0.920592	1	← C2 domain-containing, similar to calcium-dependent protein kinase, induced in low temperature,		0	0	0	0	0		0	0		0	0	0
	AT4G37460	0.898088	0.944282	0.936953	1	← transcriptional regulator (TPR domain containing protein)	← SRFR1, SUPPRESSOR OF RPS4-RLD 1	0	0	0	0	0		0	0		0	0	0
	AT5G04240	0.935676	0.945293	0.94981	1	← transcription factor (zinc-finger class), regulation of flowering time	← ELF6	0	0	0	0	0		0	0		0	0	0
	AT5G04810	0.880994	0.979881	0.983643	1	← PPR containing protein, located in chloroplast, RNA binding		0	0	0	0	0		0	0		1	0	1
	AT5G09470	1.15178	1.09186	1.10648	1	← mitochondrial dicarboxylate carrier3	← DIC3	0	0	0	0	0		0	0		0	0	0
	AT5G19100	1.11428	1.02227	1.03643	1	← peptidase aspartic		0	0	0	0	0		0	0		0	0	0
	AT5G22500	0.938515	0.988006	0.947968	1	← fatty acid reductase, connection to suberin deposition	← FAR1	0	0	0	0	0		0	0		0	0	0
	AT5G25060	0.950801	0.962547	0.975782	1	← possibly RNA splicing, involved in PhyB dependent signalling	← RRC1	0	0	0	0	0		0	0		0	0	0
	AT5G27020	1.14055	1.0498	1.07825	1	← unknown protein		0	0	0	0	0		0	0		0	0	0
	AT5G51050	1.12364	1.06347	1.06557	1	← mitochondrial ATP-Mg/Pi transporter	← APC2, ATP/PHOSPHATE CARRIER 2	0	0	0	0	0		0	0		0	0	0
	AT5G52630	0.88803	1.00822	0.962266	1	← PPR containing protein, mito, RNA editing	← MEF1, MITo.	0	0	0	0	0		0	0		0	0	0
	AT5G53740	1.13653	1.04296	1.06014	1	← unknown protein		0	0	0	0	0		0	0		0	0	0
	AT5G56290	0.952758	0.973731	0.976394	1	← receptor for peroxisomal protein transport	← ATPEX5 , EMB2790 , PEX5	0	0	0	0	0		0	0		0	0	0
	AT5G57020	0.948498	0.965324	0.957758	1	← myristoyl-CoA:protein N-myristoyltransferase, involved in SnRK1 signalling	← ATNMT1	0	0	0	0	0		0	0		0	0	0
	AT5G60880	1.11306	1.02841	1.04321	1	← regulates assymetric cell division	← BASL	0	0	0	0	0		0	0		0	0	0
	AT5G61140	0.927535	0.954078	0.959688	1	← shows 30% similarity to RCK		0	0	0	0	0		0	0		0	0	0
	AT5G64470	0.931005	0.951889	1.00801	1	← homologs are required for cellulose synthesis	← TBL12	0	0	0	0	0		0	0		0	0	0
	AT5G66985	1.16597	1.06998	1.11109	1	← unknown protein		0	0	0	0	0		0	0		1	0	1
Glc	AGI	Fructose	Sucrose	Glucose	X			0	0	0	0	0		0	0		0	0	0
	AT1G03170	1.13181	1.11318	1.19264	1	← unknown protein, expression increased during floral transition, responsive to photoperiod and suc	← FAF 2 , FTM5	0	0	0	0	0		0	0		0	0	0
	AT1G10350	0.994012	0.938388	0.916854	1	← DNAJ heat shock family protein		0	0	0	0	0		0	0		0	0	0
	AT1G11900	1.03798	1.07439	1.0913	1	← TPR-like superfamily protein		0	0	0	0	0		0	0		0	0	0
	AT1G14910	0.967436	0.956702	0.936488	1	← phospholipid/phosphatidylinositol binding, regulated through PIL5		0	0	0	0	0		0	0		0	0	0
	AT1G17090	1.00452	1.05393	1.09818	1	← EF-hand protein, unknown function		0	0	0	0	0		0	0		0	0	0
	AT1G21390	1.06324	1.05178	1.12662	1	← unknown function, required for embryo development	← EMB2170	0	0	0	0	0		0	0		0	0	0
	AT1G28320	0.96071	0.974323	0.939561	1	← peroxisomal Ser protease that removes PST2 targeting signal	← DEG15	0	0	0	0	0		0	0		0	0	0
	AT1G29450	1.04745	1.05126	1.17902	1	← SAUR like auxin responsive family	← SAUR64	0	0	0	0	0		0	0		0	0	0
	AT1G31520	1.11256	1.02799	1.13651	1	← unknown protein		0	0	0	0	0		0	0		0	0	0
	AT1G32170	0.967974	0.94774	0.925103	1	← xyloglucan endotransglucosylase-related protein, regulated by bZIP11 and SnRK1	← XTH30, XTR4	0	0	0	0	0		0	0		0	0	1
	AT1G59870	0.947358	0.944906	0.917997	1	← efflux carrier for auxin-precursor, dominantly expressed in root tissue, involved in non-host resistance,	← PDR8 , ABCG36 , PEN3	0	0	0	0	0		0	0		0	0	0
	AT1G64355	0.927053	0.94027	0.891087	1	← unknown protein, downreulated in extensive light and cold temp.		0	0	0	0	0		0	0		0	0	1
	AT1G73220	1.06909	1.0391	1.07425	1	← organic cation transporter, responsive to phosphate starvation, senescense.	← AtOCT1	0	0	0	0	0		0	0		0	0	0
	AT1G77660	1.08845	1.09742	1.19925	1	← Histone H3 K4-specific methyltransferase SET7/9, process unknown		0	0	0	0	0		0	0		0	0	0
	AT1G77680	1.01975	1.01262	1.07545	1	← ribonuclease II/R family protein, RNA processing, RNA decay	← SOV	0	0	0	0	0		0	0		0	0	0
	AT1G78220	1.01291	1.06058	1.19762	1	← 14-3-3 protein, general regulatory factor	← GRF 13, GF 14 PI	0	0	0	0	0		0	0		0	0	0
	AT2G20880	1.02892	1.03048	1.16039	1	← drought and ethylene responsive transcription factor	← ERF53	0	0	0	0	0		0	0		0	0	0
	AT2G21630	0.95646	0.946349	0.899747	1	← sec23/24 family protein, vesicle transport, COPII vesicle coat, ER to GOLGI		0	0	0	0	0		0	0		0	0	0
	AT2G25030 /// AT2G25040	1.03815	0.984589	1.1654	1	← pseudogene		0	0	0	0	0		0	0		0	0	0
	AT2G27100	0.971282	0.970272	0.936864	1	← RNA processing/splicing, required for shoot developement, mediator	← SE	0	0	0	0	0		0	0		0	0	0
	AT2G31790	0.978135	0.997384	0.897629	1	← UDP-glycosyltransferase family protein (UGP-GT)		0	0	0	0	0		0	0		0	0	0
	AT2G34160	1.02121	1.06153	1.07007	1	← nucleic acid binding, repressed by ABA in guard cells		0	0	0	0	0		0	0		0	0	0
	AT2G39870	0.977004	0.961482	0.941561	1	← unknown protein		0	0	0	0	0		0	0		0	0	0
	AT2G40910	1.1036	1.08483	1.12385	1	← unknown protein, F-box protein		0	0	0	0	0		0	0		0	0	0
	AT2G41960	0.97866	0.959837	0.948094	1	← unknown protein		0	0	0	0	0		0	0		0	0	0
	AT2G42880	0.943164	0.989157	0.930974	1	← MAPKinase 20	← MPK20	0	0	0	0	0		0	0		0	0	0
	AT2G43150	1.01011	1.0441	1.13765	1	← proline-rich extensine family protein		0	0	0	0	0		0	0		0	0	0
	AT2G43290	1.03618	1.04422	1.05398	1	← calmoduline-like MSS3, Calcium signaling	← MSS3 , CML5	0	0	0	0	0		0	0		0	0	1
	AT3G03990	0.957452	0.959283	0.939996	1	← Ahydrolase-family protein		0	0	0	0	0		0	0		0	0	1
	AT3G04070	0.942132	0.93039	0.901832	1	← transcription factor	← NAC047	0	0	0	0	0		0	0		0	0	0
	AT3G11330	0.970326	0.962039	0.940804	1	← pollen developement (RAS-LRR-related)	← PIRL9	0	0	0	0	0		0	0		0	0	1
	AT3G15450	0.918803	0.894367	0.869185	1	← Aluminium induced protein, repressed slightly later in diurnal cycle		0	1	0	0	0		1	0		1	1	1
	AT3G17365	1.0246	1.03284	1.04891	1	← SAM-dependend methyltransferase		0	0	0	0	0		0	0		0	0	0
	AT3G18290	0.930422	0.936815	0.883647	1	← putative E3 ligase, responsive in early iron deficiency, glc-responsive	← BTS ; EMB2524	0	0	0	0	0		0	0		0	0	0
	AT3G25010	1.042	1.03165	1.13029	1	←receptor like protein, involved in ABA response	← RLP41	0	0	0	0	0		0	0		0	0	0
	AT3G26740	0.907659	0.912302	0.839283	1	← CCR-like protein, mRNA levels follow circadian rhythm	← CCL	0	0	0	0	0		0	1		0	0	1
	AT3G28180	0.954155	0.959018	0.925944	1	← glucan synthase, might be involved in XyG-backbone synthesis, coexpressed with XT1	← CSLC4	0	0	0	0	0		0	0		0	0	0
	AT3G46680	1.14261	1.07655	1.16741	1	← UDP-glycosyltransferase family protein (UGP-GT)		0	0	0	0	0		0	0		0	0	0
	AT3G47250	0.962811	0.996302	0.944485	1	← protein with unknown function		0	0	0	0	0		0	0		1	0	1
	AT3G48050 /// AT3G48060	0.987493	0.944604	0.93007	1	← transcritpional regulator in the miRNA regulatory pathway	← SUO "shuttle"in chinese	0	0	0	0	0		0	0		0	0	0
	AT3G49580	1.14209	1.10212	1.16706	1	← unknown function, responsive to S-deficiency, salt stress, nitrate limitation	← LSU1	0	0	0	0	0		0	0		0	0	0
	AT3G50620	0.971641	1.05196	1.14052	1	← unknown function, P-loop containing		0	0	0	0	0		0	0		0	0	0
	AT3G55720	1.01806	0.990675	1.09309	1	← unknown function		0	0	0	0	0		0	0		0	0	0
	AT3G57540	1.04811	1.03123	1.18199	1	← putative DNA binding		0	0	0	0	0		0	0		0	0	0
	AT3G58050	0.930776	0.939901	0.895864	1	← unknown protein		0	0	0	0	0		0	0		0	0	0
	AT3G61740	1.06847	1.01342	1.08956	1	← transcriptional regulator, unknown enzyme activity, target genes	← ATX3 , SDG14	0	0	0	0	0		0	0		0	0	0
	AT4G01250	0.970138	0.974426	0.89761	1	← transcription factor	← ATWRKY22	0	0	0	0	0		0	0		1	0	0
	AT4G02320	1.07781	0.994389	1.11544	1	← plant invertase/pektine methylesterase inhibitor superfamily, putative function in cell wall modification		0	0	0	0	0		0	0		0	0	0
	AT4G03500	1.06638	1.04037	1.15889	1	← ankyrin-family protein, unknown function		0	0	0	0	0		0	0		0	0	0
	AT4G13990	1.09285	1.03014	1.09921	1	← exotosin family protein, unknown function		0	0	0	0	0		0	0		0	0	0
	AT4G23840	1.05743	1.03232	1.11134	1	←LRR-protein, unknown function (receptor)		0	0	0	0	0		0	0		0	0	0
	AT4G25150	1.11767	1.07173	1.16761	1	←acid phosphatase (41% similarity to VSP2)		0	0	0	0	0		0	0		0	0	0
	AT4G27840	1.04158	1.04492	1.1154	1	←SNARE like superfamily protein		0	0	0	0	0		0	0		0	0	0
	AT4G35550	1.01634	1.02297	1.07559	1	← transcription factor, involved in flower and fruit development	← ATWOX13	0	0	0	0	0		0	0		0	0	1
	AT4G35830	0.992649	0.97785	0.963434	1	← conversion of citrate to isocitrate	← ACO1	0	0	0	0	0		0	1		0	0	0
	AT4G38190	1.0728	1.06018	1.10203	1	← glucan synthase, might be involved in pollen development, highly expressed in flowers	← CSLD4	0	0	0	0	0		0	0		0	0	0
	AT4G39970	0.962667	0.969796	0.881637	1	← glycosinolate biosynthetic process		0	0	0	0	0		0	0		0	0	1
	AT5G01210	0.883755	0.874049	0.843041	1	← HXXXD acyl transferase family protein, responsive to salt, osmoticum, cold, ABA		0	0	0	0	0		0	0		0	0	0
	AT5G03380	0.926903	0.92873	0.912094	1	← heavymetal transport/detoxification, response to changes in Fe status		0	0	0	0	0		0	0		0	0	0
	AT5G19820	0.974011	0.961833	0.948417	1	← lyase EMB2734, increased mRNA levels in response to zinc	← EMB2734	0	0	0	0	0		0	0		0	0	0
	AT5G20140	1.06266	1.06045	1.11821	1	← haem binding, mutation leads to oxidative stress	← AtHBP5	0	0	0	0	0		0	0		0	0	0
	AT5G23050	0.970332	0.971747	0.955849	1	← function unknown, putative fatty acid synthesis	← AAE17	0	0	0	0	0		0	0		1	0	1
	AT5G36960	1.08208	1.10929	1.14929	1	← unknown protein		0	0	0	0	0		0	0		0	0	0
	AT5G43150	1.14401	1.0966	1.18967	1	← unknown protein, upregulated in drought, salt, cold and heat		0	0	0	0	0		0	0		0	0	0
	AT5G44920	1.10074	1.0681	1.11792	1	← TIR (toll-interleukin resistance) protein family, part of TX group		0	0	0	0	0		0	0		0	0	1
	AT5G45050	0.907718	0.955717	0.886087	1	← transcription factor, defense response	← ATWRKY16	0	0	0	0	0		0	0		0	0	0
	AT5G45880	1.06524	1.06184	1.13207	1	← unknown funcion, allergen and extensin family protein	← Ole e 1	0	0	0	0	0		0	0		0	0	0
	AT5G47020	0.956705	0.970627	0.952056	1	← unknown protein, secreted		0	0	0	0	0		0	0		0	0	0
	AT5G58000 /// AT5G58003	1.01771	1.0099	1.06906	1	← reticulum family protein///CPL4		0	0	0	0	0		0	0		0	0	0
	AT5G59940	0.952764	0.973621	0.937173	1	← Cysteine/Histidine-rich C1 domain family protein		0	0	0	0	0		0	0		0	0	0
	AT5G62460	0.966718	0.98099	0.931551	1	← unknown protein, AP3 and PI target gene		0	0	0	0	0		0	0		0	0	0
Suc	AGI	Fructose	Sucrose	Glucose	X			0	0	0	0	0		0	0		0	0	0
	AT1G02230	1.11559	1.16525	1.08109	1	← transcription factor, upregulated upon nitrogen supply	← NAC004	0	0	0	0	0		0	0		0	0	0
	AT1G04140	0.987452	0.927606	0.982615	1	← transducin/WD40 family protein		0	0	0	0	0		0	0		0	0	0
	AT1G10290	0.952145	0.94438	0.956928	1	← trafficing from TGN to vacuole, function in endocytosis and gametophyte developement	← ADL6 , DRP2A	0	0	0	0	0		0	0		0	0	0
	AT1G10390	0.954017	0.923192	0.940918	1	← nucleoporine autopeptidase, transporter	← Nup98a	0	0	0	0	0		0	0		0	0	0
	AT1G30515	1.10555	1.13654	1.08369	1	← unknown protein		0	0	0	0	0		0	0		0	0	0
	AT1G34260	0.957927	0.880596	0.987378	1	← unknown function	← FAB1D	0	0	0	0	0		0	0		0	0	0
	AT1G59610	0.955633	0.946336	0.957003	1	← GTPase, vesicle formation, clatherin dependend endocytosis, responsive to ABA	← ADL3 , DRP2B	0	0	0	0	0		0	0		0	0	0
	AT1G62590 /// AT1G63330	0.907945	0.880581	0.962499	1	← PPR-domain containing protein		0	0	0	0	0		0	0		0	0	0
	AT1G69850	0.958615	0.910761	0.92606	1	← ABA import, transporter	← AIT1 , NRT1:2	0	0	0	0	0		0	0		0	0	0
	AT1G70300	0.987612	0.93664	0.973887	1	← potassium transporter (low affinity), upregulated in high salinity,	← KUP2	0	0	0	0	0		0	0		0	0	0
	AT1G72390	0.95831	0.927969	0.984987	1	← unknown function		0	0	0	0	0		0	0		0	0	0
	AT1G79350	0.959706	0.929934	0.935363	1	← transcriptional regulator	← EMB1135	0	0	0	0	0		0	0		0	0	0
	AT1G80920	0.941262	0.834705	0.90001	1	← negatively regulated in the light	← J8, TOC12	0	1	0	0	0		0	0		0	1	1
	AT2G07696	0.843684	0.705592	1.01507	1	← ribosomal protein S7p/S5e family protein	← RPS7	0	0	0	0	0		0	0		1	0	1
	AT2G07716	0.950251	0.860818	1.00856	1	← pseudogene		0	0	0	0	0		0	0		0	0	0
	AT2G15580	1.01944	1.06335	1.00754	1	← RING/U-box family protein		0	0	0	0	0		0	0		0	0	0
	AT2G16485	0.888894	0.784903	0.948597	1	← putative DNA-dependent transcription initiation		0	0	0	0	0		0	0		0	0	0
	AT2G22010	0.945946	0.922346	0.993505	1	← putative RING-E3 Ubiquitin ligase, mediates KRP1 degradation	← RKP	0	0	0	0	0		0	0		0	0	0
	AT2G22125	0.967406	0.940244	0.956841	1	← interacts with CESA complex, influences degree of distribution and movement of complex	← CSI1 , POM2	0	0	0	0	0		0	0		0	0	0
	AT2G26890	0.96547	0.93312	0.94856	1	← involved in vacuolar sorting	← GRV2	0	0	0	0	0		0	0		0	0	0
	AT2G28540	0.974345	0.930906	0.957493	1	← RNA binding, expression is induced by copper		0	0	0	0	0		0	0		0	0	0
	AT2G29210	0.938613	0.918551	0.970687	1	← RNA splicing		0	0	0	0	0		0	0		0	0	1
	AT2G30110	0.976463	0.962904	0.97166	1	← E1 protein, initiation of ubiquitination, protein degradation, important for innate immunity	← UBA1	0	0	0	0	0		0	0		0	0	0
	AT2G36950	0.962636	0.916975	0.941444	1	← heavymetal transport/detoxification		0	0	0	0	0		0	0		1	0	1
	AT2G39500	1.02365	1.07691	1.06275	1	← unknown protein		0	0	0	0	0		0	0		0	0	0
	AT2G42620	0.9496	0.866256	0.930653	1	← SCF-protein, involved in regulating proteolysis, auxin transport, branching, nuclear localized in dark grown cells	← MAX2 , ORE9 , PPS	0	0	0	0	0		0	0		0	0	0
	AT2G45540	0.972632	0.934267	0.95203	1	← WD40-repeatfamily protein/beige related		0	0	0	0	0		0	0		0	0	1
	AT2G45950 /// AT3G61415	0.918972	0.901505	1.00501	1	← putative regulators of protein degradation	← SK20 , ASK20	0	0	0	0	0		0	0		0	0	0
	AT3G01780	0.95944	0.928558	0.977193	1	← vesicle trafficing, cite specific cell wall modification, clatherin-mediated endocytosis	← TPLATE	0	0	0	0	0		0	0		1	1	1
	AT3G04740	0.943662	0.888588	0.954167	1	← RNA polymerase II recruitment, part of mediator complex, regulator of transcritpion	← MED14 , SWP	0	0	0	0	0		0	0		0	0	0
	AT3G06080	0.96793	0.928236	0.992894	1	← homologs are required for cellulose synthesis, repressed slightly later in diurnal cycle	← TBL10	0	1	0	0	0		0	0		0	0	1
	AT3G08990	1.015	1.08146	1.02949	1	← Yippie family putative zinc binding		0	0	0	0	0		0	0		0	0	0
	AT3G09470	1.01848	1.05929	1.03992	1	← major facilitator family protein, unknown function		0	0	0	0	0		0	0		0	0	0
	AT3G15420	1.0273	1.16448	1.13952	1	← transcription factor (tau55 related), responsive to Calcium		0	0	0	0	0		0	0		0	0	0
	AT3G19190	0.968787	0.934447	0.964685	1	← involved in leaf senescence, autophagy, resistence to powdery mildew	← ATG2	0	0	0	0	0		0	0		0	1	0
	AT3G19540	0.990252	0.922462	0.961226	1	← unknown function, DUF620 domain		0	0	0	0	0		0	0		0	0	0
	AT3G21890	1.03625	1.1037	1.07781	1	← regulation of transcription (b-box type zinc finger protein), responsive to sucrose	← BBX31	0	0	0	0	1		0	0		0	0	0
	AT3G24280	1.03459	1.07654	1.03167	1	← small acidic protein, involved in auxin response	← SMAP 2	0	0	0	0	0		0	0		0	0	0
	AT3G29130	1.01561	1.07141	1.0506	1	← unknown protein		0	0	0	0	0		0	0		0	0	0
	AT3G43300	0.960946	0.947249	0.952754	1	← regulator of vesicle trafficing, interactor with HOPM1	← MIN7 (HOPM interactor), BEN1	0	0	0	0	0		0	0		0	0	0
	AT3G44530	0.961252	0.939358	0.990854	1	← transcriptional regulator of knox gene expression	← HIRA	0	0	0	0	0		0	0		0	0	0
	AT3G45000	1.06197	1.20135	1.09565	1	←vesicle mediated transport, subunit of ESCRTIII complex (part of the "coat" complex)	← VPS24.2	0	0	0	0	0		0	0		0	0	0
	AT3G50370	0.924545	0.909005	0.918229	1	←unknown function		0	0	0	0	0		0	0		0	0	0
	AT3G50590	0.984077	0.9577	0.973066	1	← transducin/WD40 family protein (used as ref. Gene?!)		0	0	0	0	0		0	0		0	0	0
	AT3G51770	0.951964	0.92325	0.977713	1	← negative regulator of ACS5, hypersensitive to P-starvation	← ETO1	0	0	0	0	0		0	0		1	1	1
	AT3G56590	0.883879	0.847169	0.9091	1	← unknown function, hydroxyproline rich glycoprotein family protein		0	0	0	0	0		0	0		0	0	0
	AT3G59940	0.939363	0.824566	0.894479	1	← Kelch repeat-containing F-box family protein, putative protein degradation, repressed by high [sugar]		0	0	1	0	0		0	0		0	0	0
	AT3G60240	0.983126	0.945297	0.971975	1	← protein synthesis, involved in response to virus	← EIF4G , CUM2	0	0	0	0	0		0	0		0	0	0
	AT3G62240	0.96592	0.956728	0.993138	1	← RING/U-box family protein		0	0	0	0	0		0	0		0	0	0
	AT3G63070	0.951375	0.93567	0.964819	1	← Tudor/PWWP/MBT domain-containing protein		0	0	0	0	0		0	0		0	0	0
	AT3G63460	0.97545	0.923406	0.954555	1	← CUL4-RING ubiquitin ligase complex, interacts with VPS2.2		0	0	0	0	0		0	0		0	0	0
	AT4G01575	1.02191	1.06056	1.01215	1	← serine protease inhibitor, Kazal-type family protein		0	0	0	0	0		0	0		0	0	0
	AT4G10710	0.951852	0.943035	0.964986	1	← FACT subunit, transcription factor, important for vegetative growth	← Global transcription factor C, SPT16	0	0	0	0	0		0	0		0	0	1
	AT4G12570	0.962169	0.949829	0.951852	1	← protein degradation, interacts with WRKY53, regulates leaf senescence, trichome developement, ubiquitine ligase	← UPL5	0	0	0	0	0		0	0		0	0	0
	AT4G26970	0.992335	0.963201	0.972827	1	← conversion of citrate to isocitrate	← ACO2	0	0	0	0	0		0	0		0	0	1
	AT4G27654	1.17462	1.2006	1.12885	1	← unknown protein		0	0	0	0	0		0	0		0	0	0
	AT4G28300	0.93815	0.89413	0.975096	1	← unknown function		0	0	0	0	0		0	0		0	0	1
	AT4G31160	0.97377	0.940082	0.960716	1	← E3 ubiquitine ligase complex, involved in multipe developemental processes	← DCAF1	0	0	0	0	0		0	0		0	0	0
	AT4G34020	0.963924	0.907966	0.937665	1	← essential for chloroplast development and viability, mutants grow better on suc-media	← DJ1C	0	0	0	0	0		0	0		1	1	1
	AT4G35800	0.926535	0.873015	0.946803	1	← RNA polymerase II large subunit	← RPB1	0	0	0	0	0		0	0		0	0	0
	AT4G37610	0.912148	0.747257	0.814942	1	← homolog to BT2, may have redundant function, repressed early in the light/dark cycle	← BT5	1	0	0	0	0		1	0		0	0	0
	AT5G02570	1.04323	1.13625	0.994111	1	← histone superfamily protein	← HTB10	0	0	0	0	0		0	0		0	0	0
	AT5G03345	1.01431	1.0382	1.02301	1	← unknown function		0	0	0	0	0		0	0		0	0	0
	AT5G05570	0.967477	0.941238	0.981037	1	← transducin/WD40 repeat family protein, putative vesicle transport		0	0	0	0	0		0	0		0	0	0
	AT5G06700	0.980187	0.938012	0.988395	1	← involved in coordination of sec. cell wall synthesis	← TBR	0	0	0	0	0		0	0		0	0	0
	AT5G12850	0.972288	0.938567	0.953566	1	← regulation of transcription (zinc finger protein)		0	0	0	0	0		0	0		1	1	1
	AT5G16680	0.941714	0.930064	0.991848	1	← regulation of transcription (RING/FYVE/PHD zinc finger superfamily protein)		0	0	0	0	0		0	0		1	1	1
	AT5G18670	0.846114	0.745194	0.772753	1	← putative beta-amylase 3, starch degradation	← BMY3, BAM9	1	0	0	0	0		0	0		0	0	0
	AT5G19120	0.982862	0.915105	0.938043	1	← aspartyl protease, protein degradation		0	0	0	0	0		0	0		0	0	0
	AT5G23110	0.928632	0.905826	0.926542	1	← putative regulation of transcription (zinc finger, C3HC4 type (RING finger) family protein)		0	0	0	0	0		0	0		0	0	0
	AT5G23150	0.963297	0.90644	0.95782	1	← putative transcription factor, involved inflowering	← HUA2 (enhancer of AG4 2)	0	0	0	0	0		0	0		0	0	0
	AT5G35570	0.946017	0.867804	0.990234	1	← O-fucosyltransferase (PTM)		0	0	0	0	0		0	0		0	0	0
	AT5G35980	0.963799	0.945568	0.9736	1	← proteine kinase (serin/threonin)	← YAK1	0	0	0	0	0		0	0		1	1	1
	AT5G45260	0.907909	0.849164	0.941121	1	← transcription factor	← WRKY52, SLH1	0	0	0	0	0		0	0		0	0	0
	AT5G47060	1.05703	1.10494	1.0792	1	← unknown function, senescence associated protein, induced slightly later in diurnal cycle		0	1	0	0	0		0	0		0	1	1
	AT5G56160	1.03926	1.12277	1.01629	1	← Sec14p-like phosphatidylinositol transfer family protein		0	0	0	0	0		0	0		0	0	0
	AT5G61440	0.930087	0.807915	0.849226	1	← thioredoxin family protein, repressed early in the light/dark cycle,respressed upon suc addition	← ACHT5	1	0	0	0	0		0	0		0	0	0
	AT5G62600	0.982488	0.94644	0.988461	1	← RNA metabolism, regulator of two R-genes	← MOS14	0	0	0	0	0		0	0		0	0	0
